# Supplementary material for: Efficient removal of bisphenol pollutants on imine-based covalent organic frameworks: adsorption behavior and mechanism
Source: Royal Society of Chemistry journal article supplement (doi:10.1039/d1ra02342j), 2021-01-01
Supplement: d1ra02342j1.pdf [file d1ra02342j1.pdf]

*Supporting Information for*

**Efficient Removal of Bisphenols Pollutants on Imine-Based Covalent  
Organic Frameworks: Adsorption Behavior and Mechanism**

Fu Daijun<sup>a</sup>, Zhang Qianxin<sup>b</sup>, Chen Ping<sup>a</sup>, Zheng Xiaoshan<sup>a</sup>, Hao Jun<sup>a</sup>, Mo Peiying<sup>a</sup>,

Liu Haijin<sup>c</sup>, Liu Guoguang<sup>a</sup>, Lv Wenying<sup>a\*</sup>

*<sup>a</sup>School of Environmental Science and Engineering, Guangdong University of  
Technology, Guangzhou, 516000, China*

*<sup>b</sup>School of Environmental, State Key Joint Laboratory of Environmental Simulation  
and Pollution Control (SKLESPC), Beijing Key Laboratory for Emerging Organic  
Contaminants Control, Tsinghua University, Beijing, 100084, China*

*<sup>c</sup>Key Laboratory for Yellow River and Huaihe River Water Environment and  
Pollution Control, School of Environment, Henan Normal University, Xinxiang  
453007, China*

**\* Corresponding Author:**

Lv Wenying

School of Environmental Science and Engineering, Guangdong University of  
Technology, Guangzhou, 510006, China

E-mail: [lvwy612@163.com](mailto:lvwy612@163.com); Telephone: +86-20-39322547; Fax: +86-13538982812

**TABLE OF CONTENTS**

## **TEXT**

|          |                                          |    |
|----------|------------------------------------------|----|
| Text S1. | Instrumental analysis .....              | S4 |
| Text S2. | Sorption experiments.....                | S4 |
| Text S3. | Adsorption kinetics.....                 | S4 |
| Text S4. | Adsorption isotherms .....               | S5 |
| Text S5. | Adsorption thermodynamic .....           | S6 |
| Text S6. | The effect of pH and ionic strength..... | S7 |
| Text S7. | Regeneration and reuse experiences.....  | S7 |

## **TABLES**

|           |                                                                                                                                     |     |
|-----------|-------------------------------------------------------------------------------------------------------------------------------------|-----|
| Table S1. | Kinetic model parameters in the adsorption of BPS and BPA on prepared COFs material .....                                           | S8  |
| Table S2. | Langmuir and Freundlich parameters in the adsorption of BPS and BPA on prepared COFs materials.....                                 | S9  |
| Table S3. | Comparison of adsorption performance of resulting adsorbent toward BPS and BPA with many other adsorbents reported previously ..... | S10 |
| Table S4. | Thermodynamic parameters in the adsorption of BPS and BPA on COF-2 at different temperatures .....                                  | S11 |

## FIGURES

|                                                                                                                 |     |
|-----------------------------------------------------------------------------------------------------------------|-----|
| Fig. S1. PXRD pattern of COF-1 and COF-2 after treatment with different solvents<br>.....                       | S12 |
| Fig. S2. BET surface area plot for COF-1 calculated the isotherm .....                                          | S13 |
| Fig. S3. BET surface area plot for COF-2 calculated the isotherm .....                                          | S14 |
| Fig. S4. High deconvolutions of S2p spectra of before and after adsorption of BPS<br>onto COF-1 and COF-2 ..... | S14 |
| Fig. S5. Desorption percentage of BPS and BPA from COF-2 with different<br>solvents .....                       | S15 |
| Fig. S6. The effect of water quality on adsorption. ....                                                        | S15 |

### **Text S1. Instrumental analysis**

The calibration curve of bisphenol S and bisphenol A were drawn in the concentration range of 0-80 mg·L<sup>-1</sup>, and the concentration were determined by high-performance liquid chromatography (HPLC, Shimadu, Japan) equipped with an UV detector using a SB-C18 column (150 mm×4.6 mm). All samples were filtered through 0.45µm Millipore filters before instrument analysis. The mobile phase was used under the following conditions at the flow rate of 1 mL·min<sup>-1</sup>: acetonitrile, deionized water with 2% acetic acid (50:50, v/v) for BPS; methanol, deionized water with 2% acetic acid (75:25, v/v) for BPA. The determination wavelengths 260 nm, 275 nm for BPS and BPA, respectively <sup>1</sup>.

### **Text S2. Sorption experiments**

Batch adsorption experimental conditions and detailed measurement for adsorption kinetics, adsorption isotherm, thermodynamic, pH effects, ionic strength and reusability experiments were conducted.

### **Text S3. Adsorption kinetics**

For the adsorption kinetics, 8 mg of adsorbent were dispersed in 40 ml of BPS/BPA solution (30 mg·L<sup>-1</sup>) and shaken at 220 rpm and 303 K in a water bath constant temperature oscillator. During adsorption period, the remaining concentration in series of independent sample were measured from 2 min-180 min. Afterward, 1ml of solution was collected periodically and each sample was filtered through a 0.45 µm

membrane filter. The initial and equilibrium concentration of the solutions were analyzed by HPLC. (mobile phase: acetonitrile, deionized water with 2% acetic acid (50:50, v/v) for BPS; methanol, deionized water with 2% acetic acid (75:25, v/v) for BPA. The determination wavelengths 260 nm, 275 nm for BPS and BPA, respectively)<sup>1</sup>. Two different kinetics models such as pseudo-first-order kinetics and pseudo-second order kinetics were used to analyze the equilibrium data. The kinetics models equations can be expressed as follows<sup>2,3</sup>:

$$\text{Pseudo - first order model: } \log(q_e - q_t) = \log q_e - k_1 \frac{t}{2.303} \quad (1)$$

$$\text{Pseudo - second order model: } \frac{t}{q_t} = \frac{1}{k_2 q_e^2} + \frac{t}{q_e} \quad (2)$$

Where,  $q_e$  and  $q_t$  are the adsorption capacities ( $\text{mg}\cdot\text{g}^{-1}$ ) at equilibrium and at different time  $t$  (min), respectively.  $k_1$  ( $\text{min}^{-1}$ ) and  $k_2$  [ $\text{g}/(\text{mg}\cdot\text{min}^{-1})^{-1}$ ] are the rate constant of the pseudo-first order model and pseudo-second order model, respectively.

#### **Text S4. Adsorption isotherms**

For the adsorption isotherm, 8 mg of the COFs adsorbent were added into 40 ml of  $10\text{-}80 \text{ mg}\cdot\text{L}^{-1}$  of BPS/BPA solution and shaken at 220 rpm and 303 K for 24 h. Then, 1 mL of the solution was filtered with  $0.45 \mu\text{m}$  membrane, and the residual were measured by above mentioned method.

Two isotherms models such as Langmuir and Freundlich were applied to fit the adsorption data. The equations in linear forms as follows<sup>4,5</sup>:

$$\text{Langmuir equations: } \frac{c_e}{q_e} = \frac{1}{q_{\max} k_L} + \frac{c_e}{q_{\max}} \quad (3)$$

$$\text{Freundlich equations: } \ln(q_e) = \ln(k_F) + \frac{1}{n} \ln(c_e) \quad (4)$$

where,  $q_e$  and  $q_{max}$  are the adsorption capacity and maximum adsorption capacity ( $\text{mg}\cdot\text{g}^{-1}$ ),  $c_e$  is the concentration at equilibrium ( $\text{mg}\cdot\text{L}^{-1}$ ),  $k_L$  is the Langmuir constant ( $\text{L}\cdot\text{mg}^{-1}$ ),  $1/n$  is the intensity of the sorption process,  $k_F$  is the Freundlich model constant,  $R$  is the universal gas constant,  $T$  is the temperature (K).

#### **Text S5. Adsorption thermodynamic**

The adsorption thermodynamics were studied at different temperatures (303, 313 and 323 K) by adding 8 mg of the COFs into 40 ml of 10-80  $\text{mg}\cdot\text{L}^{-1}$  of BPS/BPA solution and shaken at 220 rpm for 24 h. Then, 1 mL of the solution was filtered with 0.45  $\mu\text{m}$  membrane, and the residual were measured by above mentioned method. The thermodynamic parameters were obtained by the following thermodynamic equations

6, 7:

$$\Delta G = -RT \ln k_d \quad (5)$$

$$\ln k_d = \frac{\Delta S}{R} - \frac{\Delta H}{RT} \quad (6)$$

$$k_d = \frac{q_e}{c_e} \quad (7)$$

where,  $R$  (8.314 J/mol K) and  $T$  (k) are universal gas constant and absolute temperature.  $c_e$  ( $\text{mg}\cdot\text{L}^{-1}$ ) and  $q_e$  ( $\text{mg}\cdot\text{g}^{-1}$ ) are equilibrium concentration of adsorbate and equilibrium adsorption amount of adsorbate, respectively.  $\Delta S$  and  $\Delta H$  were obtained from intercept and slope of plotting relationship between  $\ln k_d$  and  $1/T$ , respectively.

#### **Text S6. The effect of pH and ionic strength**

The pH of BPS/BPA solution was adjusted to 4-10 by adding 0.1  $\text{mol}\cdot\text{L}^{-1}$  HCl or NaOH solution into desired pH range (4-10). 8 mg of adsorbents were shake with 40

ml of BPS/BPA solutions ( $30 \text{ mg}\cdot\text{L}^{-1}$ ) with varying pH at 303 K for 3 h. The initial and equilibrium concentrations of BPS/BPA were measured by HPLC. The aqueous solution of NaCl was used as control ionic strength and range from 0-1  $\text{mol}\cdot\text{L}^{-1}$ .

#### **Text S7. Regeneration and reuse experiences**

Four sorption-regeneration cycles were performed to evaluate the recyclability and reusability of the COFs adsorbent. For sorption, 8 mg adsorbent was added into 100 ml centrifuge tube containing 40 ml of  $30 \text{ mg}\cdot\text{L}^{-1}$  BPS/BPA solution. The solution was shaken on a water bath thermostatic oscillator at 220 rpm for 3 h at 303 K. Then, the COFs were separated and collected by an organic filter membrane. For desorption, the collected adsorbent was re-dispersed in 40 ml methanol and the mixture was shaken at 220 rpm for 1 h at 303 K. Then, the regenerated adsorbent was collected by an organic filter membrane from methanol solution and washed several times with deionized water. After drying, the regenerated COFs were used in the next sorption experience.

Table S1. Kinetic model parameters in the adsorption of BPS and BPA on prepared COFs materials

| Adsorbate | Adsorbent | $q_{e,exp}$ | Pseudo-first-order                   |                         |        | Pseudo-second-order                  |                         |        |
|-----------|-----------|-------------|--------------------------------------|-------------------------|--------|--------------------------------------|-------------------------|--------|
|           |           |             | $q_{e,cal}$<br>( $mg \cdot g^{-1}$ ) | $k_1$<br>( $min^{-1}$ ) | $R^2$  | $q_{e,cal}$<br>( $mg \cdot g^{-1}$ ) | $k_2$<br>( $min^{-1}$ ) | $R^2$  |
| BPS       | COF-2     | 139         | 43.00                                | 0.021                   | 0.6624 | 138.89                               | 0.004                   | 0.9991 |
|           | COF-1     | 124         | 26.94                                | 0.024                   | 0.5995 | 125.00                               | 0.007                   | 0.9997 |
| BPA       | COF-2     | 115         | 45.4255                              | 0.020                   | 0.7415 | 116.28                               | 0.003                   | 0.9984 |
|           | COF-1     | 84          | 27.8676                              | 0.026                   | 0.5714 | 84.03                                | 0.004                   | 0.9977 |



Table S2. Langmuir and Freundlich parameters in the adsorption of BPS and BPA on prepared COFs materials

| Adsorbate | Adsorbent | Langmuir model                                  |                                             |        |       | Freundlich model                                           |      |        |
|-----------|-----------|-------------------------------------------------|---------------------------------------------|--------|-------|------------------------------------------------------------|------|--------|
|           |           | $q_{\max}$<br>( $\text{mg}\cdot\text{g}^{-1}$ ) | $K_L$<br>( $\text{L}\cdot\text{min}^{-1}$ ) | $R^2$  | $R_L$ | $K_F$<br>( $\text{L}\cdot\text{min}^{-1}$ ) <sup>1/n</sup> | n    | $R^2$  |
| BPS       | COF-2     | 200.00                                          | 1.01                                        | 0.9981 | 0.03  | 101.70                                                     | 4.82 | 0.7602 |
|           | COF-1     | 158.73                                          | 1.13                                        | 0.9989 | 0.03  | 26.49                                                      | 2.01 | 0.8704 |
| BPA       | COF-2     | 149.25                                          | 0.61                                        | 0.999  | 0.05  | 66.83                                                      | 4.40 | 0.8794 |
|           | COF-1     | 131.58                                          | 0.26                                        | 0.9988 | 0.11  | 44.58                                                      | 3.58 | 0.9577 |

Table S3. Comparison of adsorption performance of resulting adsorbent toward BPS and BPA with many other adsorbents reported previously

| Adsorbate | Adsorbent                           | Equilibrium time (h) | $Q_{\max}$ (L $\cdot$ min <sup>-1</sup> ) | Temperature (°C) | Reference |
|-----------|-------------------------------------|----------------------|-------------------------------------------|------------------|-----------|
| BPA       | PAC-PNIPAM                          | 24                   | 116.3                                     | 25               | 8         |
|           | MMIPs                               | 12                   | 142.86                                    | 25               | 9         |
|           | SMZFA                               | 24                   | 114.9                                     | 25               | 10        |
|           | graphene                            | 6                    | 182                                       | 29               | 11        |
|           | Conventional AC                     | 5                    | 30.8                                      | 25               | 12        |
|           | COF-1                               | 3                    | 124.66                                    | 30               | This work |
|           | COF-2                               | 3                    | 144.58                                    | 30               |           |
| BPS       | NZY                                 | 5                    | 25.64                                     | 25               | 13        |
|           | NZSM-5                              | 2                    | 41                                        | 25               | 14        |
|           | CA-P-CDP                            | 0.25                 | 48.25                                     | 25               | 15        |
|           | Fe <sub>3</sub> O <sub>4</sub> @COF | 2                    | 21.78                                     | 25               | 16        |
|           | Conventional AC                     | 12                   | 123                                       | 25               | 17        |
|           | COF-1                               | 3                    | 157                                       | 30               | This work |
|           | COF-2                               | 3                    | 195.24                                    | 30               |           |

Table S4. Thermodynamic parameters in the adsorption of BPS and BPA on COF-2 at different temperatures

| Adsorbate | Temperature<br>(K) | $\ln k_d$ | $\Delta G$<br>(KJ $\cdot$ mol <sup>-1</sup> ) | $\Delta H$<br>(KJ $\cdot$ mol <sup>-1</sup> ) | $\Delta S$<br>(J $\cdot$ (mol $\cdot$ K <sup>-1</sup> ) <sup>-1</sup> ) |
|-----------|--------------------|-----------|-----------------------------------------------|-----------------------------------------------|-------------------------------------------------------------------------|
|           | 303                | 1.681     | -4.236                                        |                                               |                                                                         |
| BPS       | 313                | 1.013     | -2.552                                        | -37.137                                       | -109.080                                                                |
|           | 323                | 0.773     | -1.947                                        |                                               |                                                                         |
|           | 303                | 7.925     | -19.965                                       |                                               |                                                                         |
| BPA       | 313                | 6.684     | -17.393                                       | -82.310                                       | -206.295                                                                |
|           | 323                | 5.906     | -15.861                                       |                                               |                                                                         |

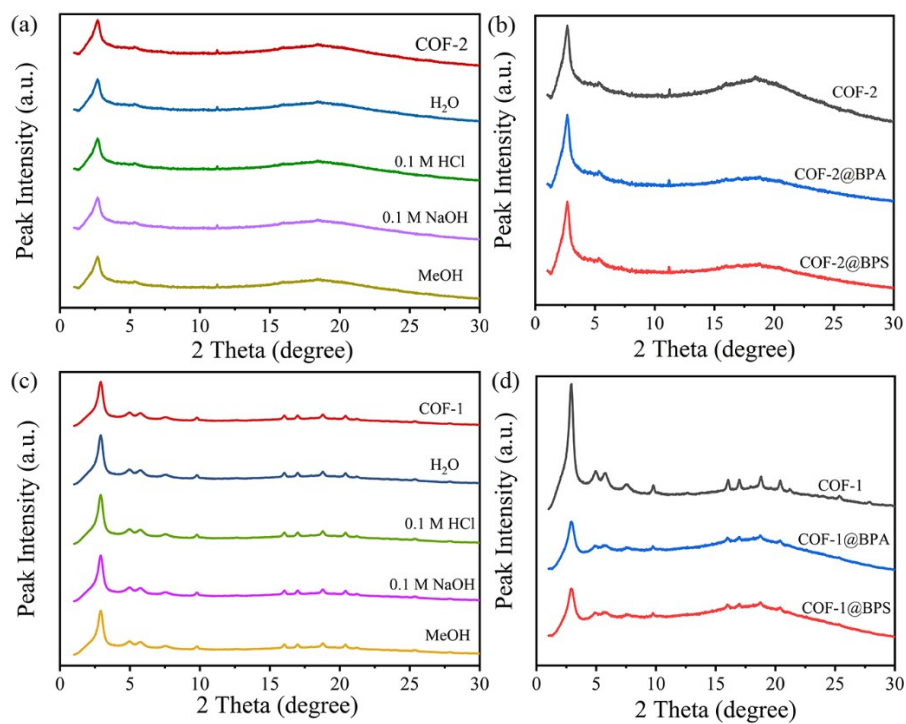

Fig. S1 (a, c) PXRD pattern of COF-1 and COF-2 after treatment with different solvents for 24 h; (b, d) PXRD pattern of before and after adsorption of BPS and BPA onto COF-1 and COF-2

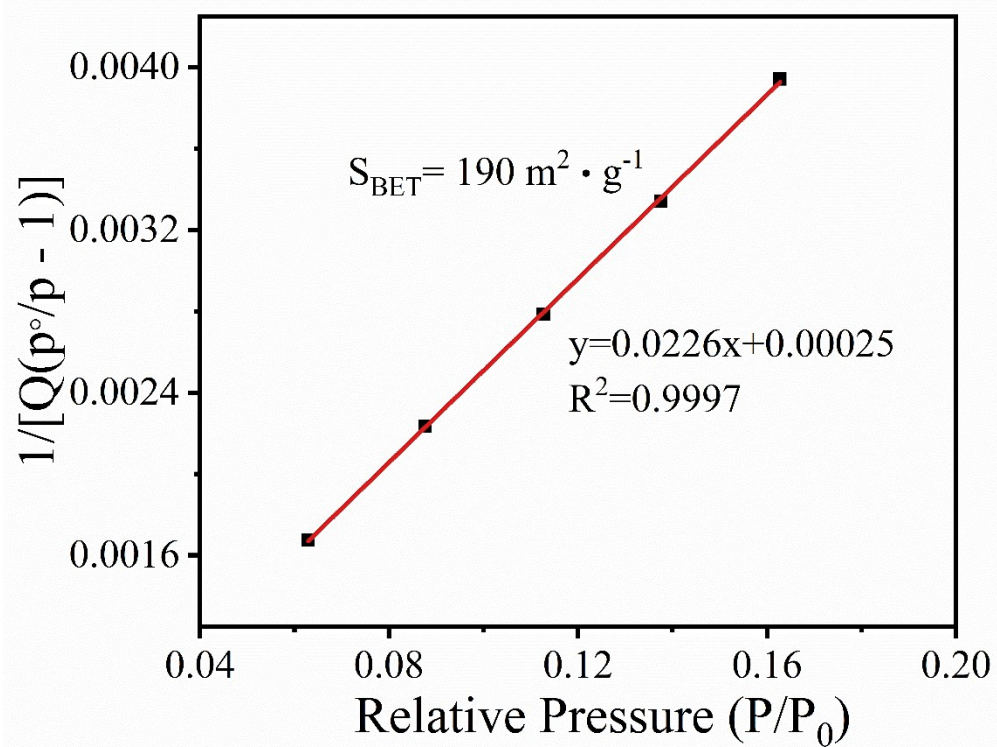

Fig. S2 BET surface area plot for COF-1 calculated from the isotherm

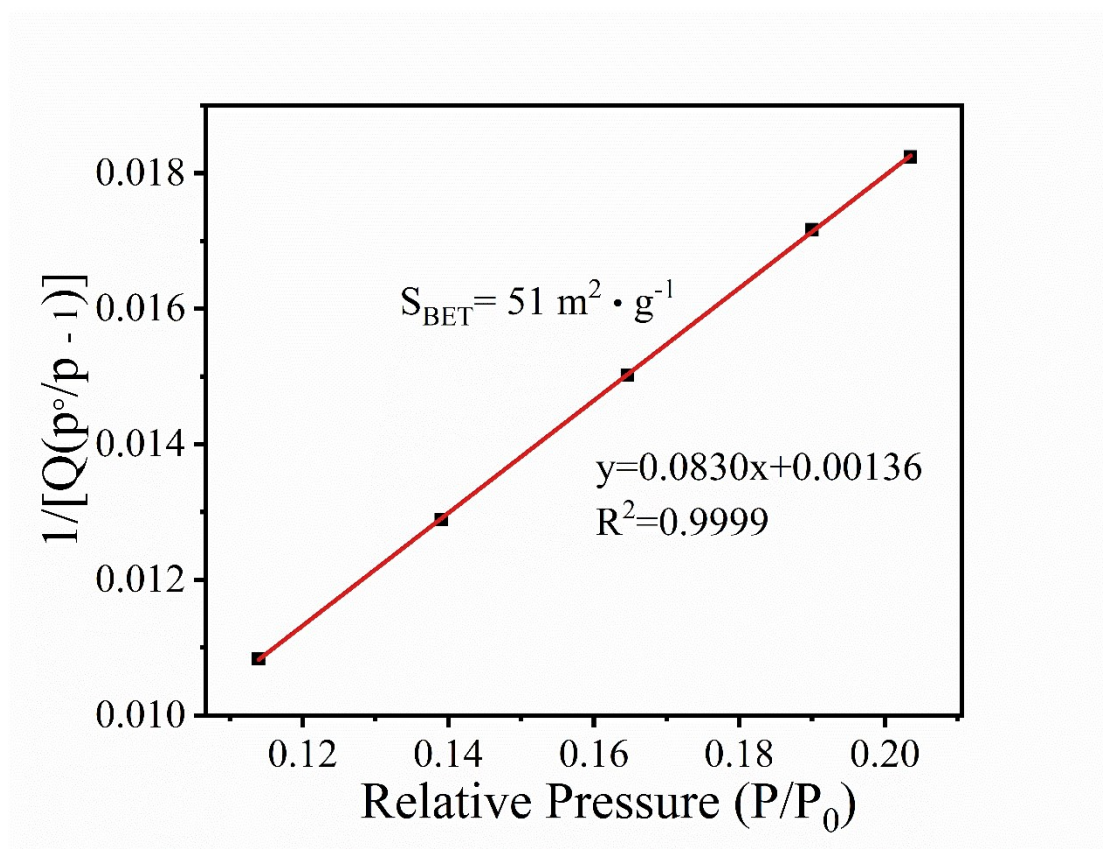

Fig. S3 BET surface area plot for COF-2 calculated from the isotherm

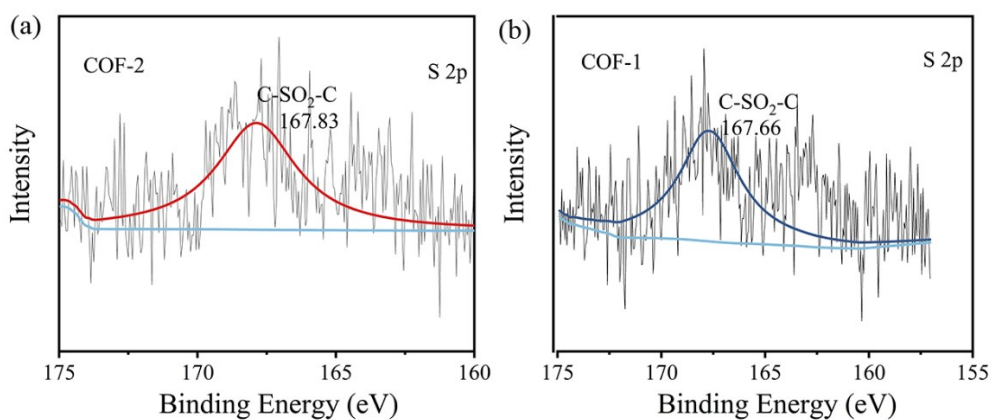

Fig. S4 High deconvolutions of S2p spectra of before and after adsorption of

BPS onto COF-1 and COF-2

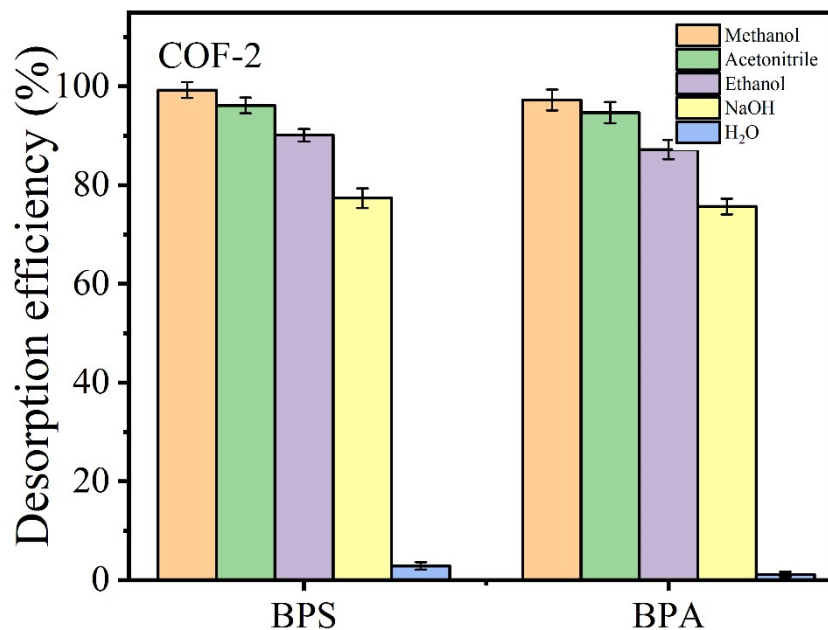

Fig. S5 Desorption percentage of BPS and BPA from COF-2 with different solvents.

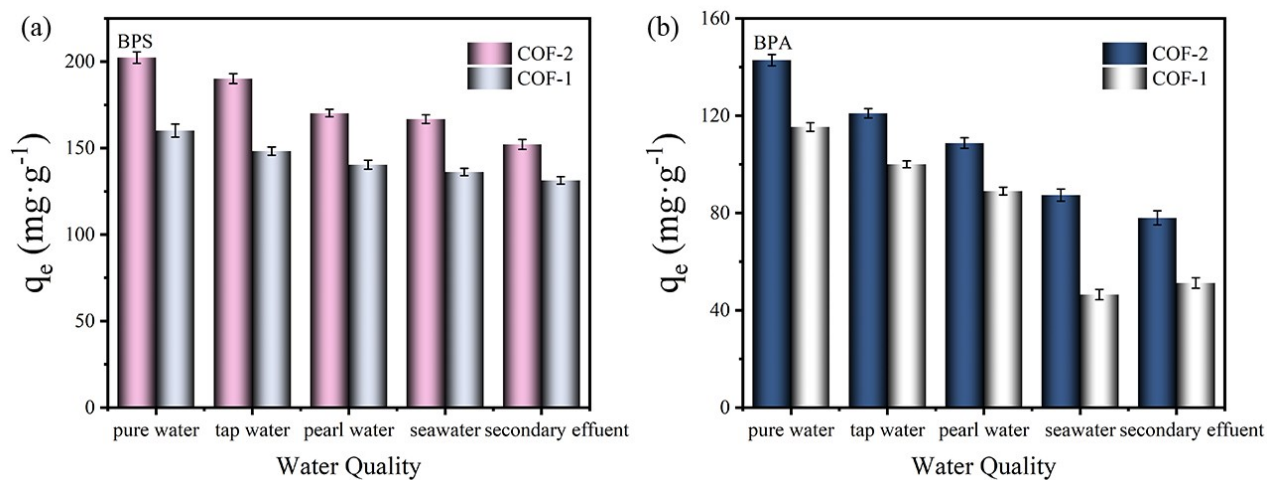

Fig. S6 (a, b) The effect of water quality on adsorption (In each case  $C_0 = 50$   $\text{mg}\cdot\text{L}^{-1}$ ,  $T = 303$  K,  $t = 24$  h,  $m/V = 0.2$   $\text{g}\cdot\text{L}^{-1}$ ).

## References

- 1 J. Li, S. Y. Pang, Y. Zhou, S. Sun, L. Wang, Z. Wang, Y. Gao, Y. Yang and J. Jiang, *Water Res*, 2018, 143, 47-55.
- 2 Y. Zhou, X. Liu, Y. Xiang, P. Wang, J. Zhang, F. Zhang, J. Wei, L. Luo, M. Lei and L. Tang, *Bioresource Technology*, 2017, 245, 266-273.
- 3 Y. Zhou, X. Liu, L. Tang, F. Zhang, G. Zeng, X. Peng, L. Luo, Y. Deng, Y. Pang and J. Zhang, *J Hazard Mater*, 2017, 333, 80-87.
- 4 A. H. M. G. Hyder, S. A. Begum and N. O. Egiebor, *Journal of Environmental Chemical Engineering*, 2015, 3, 1329-1336.
- 5 H. D. Utomo and K. A. Hunter, *Environmental Technology*, 2006, 27, 25-32.
- 6 Y. Yu, Y.-Y. Zhuang, Z.-H. Wang and M.-Q. Qiu, *Chemosphere*, 2004, 54, 425-430.
- 7 M. Purchała, H. Grajek, Z. Witkiewicz, M. Szala and K. Kalus, *J Chromatogr A*, 2020, 1622, 461120.
- 8 Z. Gong, S. Li, J. Ma and X. Zhang, *Sep Purif Technol*, 2016, 157, 131-140.
- 9 W. Guo, W. Hu, J. Pan, H. Zhou, W. Guan, X. Wang, J. Dai and L. Xu, *Chem Eng J*, 2011, 171, 603-611.
- 10 Y. Dong, D. Wu, X. Chen and Y. Lin, *Journal of Colloid and Interface Science*, 2010, 348, 585-590.
- 11 J. Xu, L. Wang and Y. Zhu, *Langmuir*, 2012, 28, 8418-8425.
- 12 Z. Sun, L. Zhao, C. Liu, Y. Zhen, W. Zhang and J. Ma, *Chem Eng J*, 2019, 372, 896-904.
- 13 N. Goyal, S. Barman and V. K. Bulasara, *Journal of Molecular Liquids*, 2016, 224, 1154-1162.
- 14 N. Goyal, S. Barman and V. K. Bulasara, *Microporous and Mesoporous Materials*, 2018, 259, 184-194.
- 15 Y. Lv, J. Ma, K. Liu, Y. Jiang, G. Yang, Y. Liu, C. Lin, X. Ye, Y. Shi, M. Liu and L. Chen, *J Hazard Mater*, 2021, 403, 123666.
- 16 D. Wei, J. Li, Z. Chen, L. Liang, J. Ma, M. Wei, Y. Ai and X. Wang, *Journal of*



Molecular Liquids, 2020, 301, 112431.

17 J. M. Park and S. H. Jung, Chem Eng J, 2020, 396, 125224.
